# 1 **First report on Bacterial Diversity of Potable Spring water of Indian Himalayan Region**

2 Ashish Kumar Singh<sup>1</sup>, Saurav Das<sup>2</sup>, Samer Singh<sup>3</sup>, Varsha Rani Gajamer<sup>1</sup>, Nilu Pradhan<sup>1</sup>

3 Yangchen D. Lepcha<sup>4</sup> and Hare Krishna Tiwari<sup>1\*</sup>

---

4  
5 <sup>1.</sup> Department of Microbiology, School of Life Sciences, Sikkim University, Gangtok,  
6 Sikkim

7 <sup>2.</sup> DBT- Advanced Institutional Biotech Hub, Bholanath College, Dhubri, Assam

8 <sup>3.</sup> Institute of Microbial Technology, Chandigarh University, Chandigarh, Punjab

9 <sup>4.</sup> State Institute of Rural Development, Government of Sikkim, Gangtok, Sikkim, India.

---

10  
11 Corresponding Author: Dr. Hare Krishna Tiwari, Department of Microbiology, School of Life  
12 Sciences, Sikkim University, Gangtok, Sikkim. Email ID: hktiwari\_2005@rediffmail.com  
13 Mob: 8250334595

---

## 14 **Abstract:**

15  
16  
17 Water quality of a region directly corroborates with the health index of people. People in the  
18 Himalayan hills mainly depend upon the spring water for potability. To determine the microbial  
19 ecology of the spring waters of Sikkim, the variable region of 16S rRNA has been sequenced  
20 using Illumina MiSeq. Phylum wise annotation showed the East and North district are mostly  
21 dominated by *Proteobacteria* (41% and 35.80%), whereas West and South district is dominated  
22 by *Planctomycetes* (38.46%) and *Verrucomicrobia* (33%). The consistent dominance phyla in  
23 the all the four districts were *Bacteriodetes* (34-24%) which was highest dominancy in North  
24 district and lowest in wets district. Genus wise distribution showed the abundance of *Brevifolis*,

25 *Flavobacterium*, *Verrucomicrobia* subdivision3, *Emticica*, *Cytophaga*, *Prosthecoacter*,  
26 *Planctomycetes*, *Varivorax*, *Arcicella*, *Isosphaera*, *Sedimunibacterium* etc. The East district  
27 showed highest dominancy of genus *Emticicia* whereas *Planctomycetes* in the West district. The  
28 North district was mainly dominated by genus *Arcicella* and *Brevifollis* in the South district.  
29 North on the antonymous showed totally different sets of microbial diversity. North district  
30 showed an abundance of *Arcicella*, *Planctomycetes*, *Schlerensia* and *Azohydromonas*. The heat  
31 map produced by Bray Curtis distance method produced three clusters which showed the close  
32 relationship between West and East district microbiome that further related to South district. The  
33 sample of North district formed out group that showed different community structure from other  
34 three districts. The principle component analysis was showed that the east and South district  
35 samples are closely related and distantly correlated to the west Sikkim, but the North district  
36 showed completely different microbial community. The canonical correspondence analysis  
37 showed correlation between bacterial diversity and hydrochemistry and it was found that the  
38 bacterial diversity was influenced by the concentration of different metallic ions like sodium,  
39 calcium, barium and iron. This is a first report from the Eastern Himalayan region of India and it  
40 largely enhances our knowledge about the microbial structure of potable spring water of Eastern  
41 Himalayan. This study is useful for Government of India as well as the state government to adopt  
42 the different strategic treatment procedures to improve the quality of water that is supplied to the  
43 community resides in the Himalayan regions and solely dependent on this untreated spring water.

44 **Keywords: Sikkim, Spring Water, Metagenomics, Bacteria, Proteobacteria, Heat Map**

45

46

47

## 48 **1.0 Introduction:**

49 Microbial communities are the key members of many ecosystems on the earth  
50 (Lagkouvardos *et al.*, 2016). The word microbial communities can be described in the terms  
51 of richness or evenness as well as composition i.e. abundance of taxa and genes in the sample  
52 (Rothschild, 1991). They play a significant role in crucial biological functions ranging from  
53 nitrogen and carbon cycles in the environment to regulation of metabolic and immune  
54 responses in inhabited animal and human hosts (Rothschild, 1991; Hörmannspurger *et al.*,  
55 2012; Lagkouvardos *et al.*, 2016). Hence, the study of microbial ecology is important for  
56 proper understanding of these microbial communities and their functional impact  
57 (Lagkouvardos *et al.*, 2016).

58 Around one-third of global freshwater reserves are placed in subsurface streams and  
59 aquifers which represent as a freshwater source for human consumption as well as irrigation  
60 (Hemme *et al.*, 2015). As good quality freshwater is an important natural source for domestic  
61 as well as the industrial purpose which is gradually exposed by a human (Van Rossum *et al.*,  
62 2015; Vörösmarty *et al.*, 2010) as well as anthropogenic activity that affect the quality of  
63 water (Vörösmarty *et al.*, 2010). Throughout the world contamination of water bodies by  
64 waterborne pathogens and disease caused by them are a major water quality concern (Pandey  
65 *et al.*, 2014). The potential host-specific nature of the microbes they have long been used as  
66 an indicator of poor water quality (Staley *et al.*, 2013). Although, these tests for detection of  
67 pathogens are based on culture-dependent methods which carry both false positive as well as  
68 a false negative result (McLain *et al.*, 2011; Staley *et al.*, 2013). The exploration of microbial  
69 communities through culture-dependent methods were used from ancient time, but on the  
70 standard laboratory media less than 1%, bacterial species of the environmental communities

71 were culturable (Staley and Sadowsky, 2016). To overcome the traditional culture methods,  
72 now metagenomics delivers a suitable method for monitoring the environmental communities  
73 via high-throughput manner. Such techniques have revealed unprecedented taxonomic and  
74 functional diversity in aquatic and terrestrial habitats (Sogin *et al.*, 2006). The term  
75 metagenomics describes as the sequencing of total DNA isolated directly from the  
76 environmental samples i.e. ‘metagenomes’ which simultaneously provides the access of  
77 genetic information of microbial communities from the mixed environment (Dinsdale *et al.*,  
78 2008). By applying this approach, functional and taxonomic microbial diversity can be  
79 described and then changes in communities can be monitored over time and space in  
80 response to anthropogenic or environmental impacts related to human health (Port *et al.*,  
81 2012). The growing accessibility of next-generation DNA sequencing (NGS) methods has  
82 greatly advanced our understanding of microbial diversity in medical and environmental  
83 science (Lee *et al.*, 2017). The Next-generation sequencing (NGS) methods have prominently  
84 increased sequencing throughput by using massively parallel sequencing (Sogin *et al.*, 2006).  
85 The amplification of small but variable regions of the 16s rDNA i.e. V3, V4, V5 or V6  
86 hypervariable regions has provided very profound sequencing of bacterial ecology. This  
87 method has used for the identification of very rare populations which is present in very low  
88 abundance that may necessary for the functional diversity and ecosystem stability (Sogin *et*  
89 *al.*, 2006; Staley *et al.*, 2013). Several bacterial communities from different environmental  
90 samples like marine waters (Brown *et al.*, 2009), soils (Jones *et al.*, 2009), wastewater  
91 (Sanapareddy *et al.*, 2009), contaminated water (Das *et al.*, 2017) and several human  
92 microbiomes were successfully characterized (Staley *et al.*, 2013; Sanapareddy *et al.*, 2009).

93           The range of Himalaya is being the source of innumerable perennial rivers, streams as  
94           well as springs and the mountain peoples, are largely dependent on this spring water for their  
95           sustenance. In mountain regions, there are several natural discharges of groundwater from  
96           several aquifers in the form of Springs. The mountain Springs are locally known as Dharas  
97           which is in most cases unconfined. In Sikkim, most of the springs are denoted as ‘Devithans’  
98           which are considered as sacred and protected as well as prevented from any living  
99           interferences to maintain the holiness of the respected springs. In Sikkim, about 80% of the  
100          rural households population depend on spring water for their drinking as well as household  
101          purpose (Tambe *et al.*, 2012). In the current study, we tried to explore the overall bacterial  
102          ecology of spring water of rural as well as urban areas of Sikkim, North East India on the  
103          basis of a culture-independent study of conserved region V3-V4 of 16S rRNA gene. Along  
104          with microbial ecology physicochemical analysis was also done to correlate with the  
105          diversity study.

## 106   **2.0 Materials and Methods:**

### 107   **2.1 Site Description**

108   The northeastern region of India is one of the biodiversity hotspots in the country. It consists of  
109   eight states which are often referred to as seven sisters (Assam, Arunachal Pradesh, Manipur,  
110   Nagaland, Tripura, Meghalaya, Mizoram) and one brother state ( Sikkim). Sikkim is the second  
111   smallest State of India lying in ecological hotspot region of the lower eastern Himalayan belt. It  
112   has both alpine and subtropical climate with a high mountain range of widespread altitude  
113   variation (300-8598 m). It is the host to Kanchenjunga (8598m), the highest peak in India and  
114   third highest on earth. The state is subdivided into four districts – East Sikkim, West Sikkim,  
115   South Sikkim and North Sikkim. This mountain state is a wonder when it comes to water. It is a

116 house of waterfalls, springs, river, and lakes, which are always an attractant to tourists and nature  
117 lovers. Rainfall is the primary mode of recharge for most of the surface water sources. The  
118 precipitation of the water in the mountain range causes surface run-off which often takes the  
119 shape of streams, springs, and kholas (local name for springs). These springs remain as an  
120 important source of potable water for the local residents (**Fig. 1**).

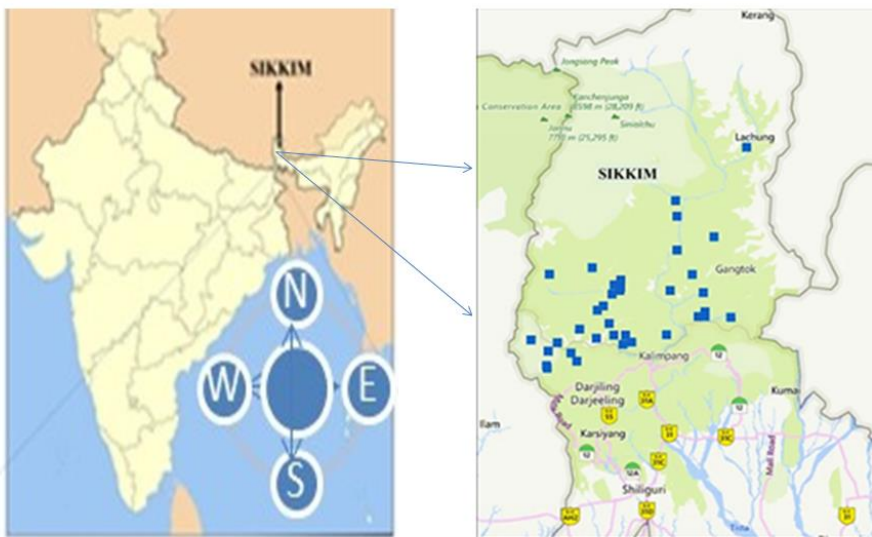

121  
122 **Fig. 1:** Map of Study are with regional reference with respect to Map of India. The location is  
123 marked with respect to their GPS location [latitude and longitude] (Supplementary File – S1:  
124 Name of the place with their GPS location).

## 125 **2.2 Sampling Procedures and Processing**

126 A total of 40 samples, 10 from each district was collected in nalgene wide mouth sterile sample  
127 bottle (ThermoFisher Scientific, USA) for microbiome analysis. Primary physical parameter  
128 including pH and temperature were tested using portable multimeter probe(Hi-media, Mumbai).  
129 The physicochemical parameters were analyzed with Induced Coupled Plasma- Mass

130 Spectrometry (ICP-MS) (**Table. 1**). For total microbial diversity analysis, collected samples were  
131 thoroughly mixed with the equal ratio (1:1) based on the distribution like East, West, South and  
132 North district separately on different vials to prepare four composite samples of 100ml,  
133 representative of the four districts.

### 134 **2.3 DNA Extraction**

135 DNA from water sample was extracted using DNeasy PowerWater Kit (MO BIO Laboratories,  
136 Carlsbad, CA, USA) in accordance with the manufacturer's instruction. Quality of the DNA was  
137 checked on 0.8% agarose gel and DNA was quantified using Qubit Fluorometer (Vr. 4.0;  
138 Thermofisher Scientific, USA), which has a detection limit of 10 -100 ng/  $\mu$ l (**Table. 1S**).

### 139 **2.4 Metagenomic Sequencing**

#### 140 **2.4.1 Preparation of 2x300 MiSeq library**

141 The amplicon libraries were prepared using Nextera XT Index Kit (Illumina inc.) according to  
142 16S metagenomic sequencing library preparation protocol (Part # 15044223 Rev. B). For  
143 amplification of eubacterial and archaeal V3-V4 region, specific primer pair V3 Forward:  
144 GCCTACGGNGGCWGCAG and V4 Reverse: ACTACHVGGGTATCTAATCC were  
145 synthesized and used. The amplified product was confirmed on 1.2% agarose gel. The adaptor-  
146 ligated amplicons were amplified using i5 and i7 primer for the addition of multiplexing index  
147 sequence required for cluster generation (P5 and P7 standard of Illumina cycle sequencing). The  
148 amplicon library was purified with AMPureXP beads (Beckman Coulter Genomics, Danvers,  
149 MA, USA). The amplified library was validated by Bioanalyzer 2100 (Agilent Technologies)  
150 using High Sensitivity (HS) DNA chips and concentration was quantified by Qubit fluorometer  
151 (**Table. S2**).

#### 152 **2.4.2 Next-generation Sequencing and Sequence Analysis**

153 Based on the data as obtained from the Qubit fluorometer and the bioanalyzer, 500µl of the 10  
154 pM library was loaded into MiSeq cartridge for cluster generation and sequencing using Paired-  
155 end sequencing method. The sequence data were analyzed using the QIIME (Quantitative  
156 Insights Into Microbial Ecology) version 1.8.0 software program (Wang *et al.*, 2018). The  
157 adapter trimmed sequence was subjected to pre-processing for De-replication, Singleton  
158 removal, Chimera filtering with SolexaQA. Sequences with Phred score lower than 20,  
159 ambiguous bases having primer mismatch and low read length less than 100bp were removed.  
160 Sequences were grouped into Operational Taxonomic Units (OTUs) at 97% sequence similarity  
161 level using UCLUST (Edgar, 2010) and a consensus taxonomic classification was assigned to  
162 each representative OTU using the UCLUST classifier with a Greengenes 13.8 reference  
163 database (DeSantis *et al.*, 2006).

## 164 **2.5 Statistical Analysis**

165 Normalization of the OTUs relative abundance data was performed by log transformation  $\log_{10}$   
166  $(x_i+1)$ . Diversity analysis of the microbial ecology of spring water was authenticated with alpha,  
167 Shannon and Simpson diversity indices and test of significant difference were done by one-way  
168 using PAST software (ver. 3.1). Principle component analysis was carried out using R statistics  
169 (package – facto extra). Heatmap was constructed using R – statistics (package – ggplot) using  
170 Bray Curtis distance method to visualize the comparative differences in the microbiome  
171 community by excluding the taxa with less than <0.1% of abundance. Canonical Correspondence  
172 Analysis (CCA) was used to determine the correlative relationship between the microbial  
173 community (Phylum level) and the physicochemical parameters (R-Statistics, Package – Vegan).

## 174 **2.6 Data Availability**



175 The sequence obtained through high throughput sequencing method was submitted to NCBI  
176 Server and available under the accession number of East Sikkim Fresh water is SRX4016322,  
177 West Sikkim is SRX4016323, South Sikkim SRX4016320 and North Sikkim is SRX4016321.

### 178 3.0 Results

#### 179 3.1 Physicochemical Properties of the Samples

180 Different physicochemical parameters were determined by multiprobe parameter (on site) and  
181 IC-PMS as mentioned in **Table.1**. All the water samples collected were normal to alkaline in  
182 nature. The temperature was 22 - 25°C in most of the samples except those collected from the  
183 North Sikkim, which showed a little drop in the overall temperature with a range of 17 – 22° C.

| <b>Physicochemical Parameter</b> | <b>East (E)</b> | <b>South (S)</b> | <b>West (W)</b> | <b>North (N)</b> |
|----------------------------------|-----------------|------------------|-----------------|------------------|
| pH                               | 6.5 -7.5        | 6.5–7.5          | 6.5–7.5         | 6.5–7.5          |
| Temp (°C)                        | 22 - 25         | 22 - 25          | 22 - 25         | 17 – 22          |
| Ba (Barium) (ng/l)               | 14.18           | 5.313            | 9.761           | 10.118           |
| Pb (Lead) (ng/l)                 | 0.04            | 0.023            | 0.036           | 0.051            |
| Ag (Silver) (ng/l)               | 0.018           | 0.005            | 0.017           | 0.018            |
| Al (Aluminium) (ng/l)            | 1.011           | 1.315            | 1.011           | 1.315            |
| Ca (Calcium) (ng/l)              | 35.205          | 8.525            | 25.71           | 13.412           |
| Cd(Cadmium) (ng/l)               | 0.026           | 0.011            | 0.012           | 0.024            |
| Cr(Chromium) (ng/l)              | 1.517           | 0.249            | 1.16            | 1.069            |
| Cs(Cesium) (ng/l)                | 0.026           | 0.017            | 0.025           | 0.012            |
| Cu(Copper) (ng/l)                | 3.025           | 3.206            | 1.941           | 2.106            |
| Fe(Iron) (ng/l)                  | 10.869          | 1.615            | 10.823          | 4.763            |
| Ga(Gallium) (ng/l)               | 0.709           | 0.227            | 0.419           | 0.436            |

|                                                   |        |        |        |          |
|---------------------------------------------------|--------|--------|--------|----------|
| Hg(Mercury) (ng/l)                                | 0.007  | 0.007  | 0.004  | 0.00184  |
| Na(Sodium) (ng/l)                                 | 71.618 | 71.618 | 52.327 | 42.31785 |
| Total Dissolved Solid (ppm)                       | 41.5   | 41.5   | 13.5   | 39.5186  |
| Electric conductivity ( $\mu\text{S}/\text{cm}$ ) | 184.3  | 184.3  | 96     | 177.287  |

**Table**

188

**1:**

189 Physicochemical Parameter of the composite samples. Elemental analysis was done with ICP-  
 190 MS and pH, the temperature was recorded at the site with a multiprobe parameter (Hanna  
 191 Instruments).

### 192 3.2 Refraction Curve and Diversity Index

193 Rarefaction curve and diversity index showed (**Fig. 2**) most of the microbial species were  
 194 sequenced and identified, and significant variations in diversity among the water samples of four  
 195 districts were observed. Samples from North and East districts showed high diversity as  
 196 compared to the south and west districts, with Simpson index of N: 0.6988 & E: 0.6928 and S:  
 197 0.7499 & W: 0.7356 respectively (Supplementary Table. S3).

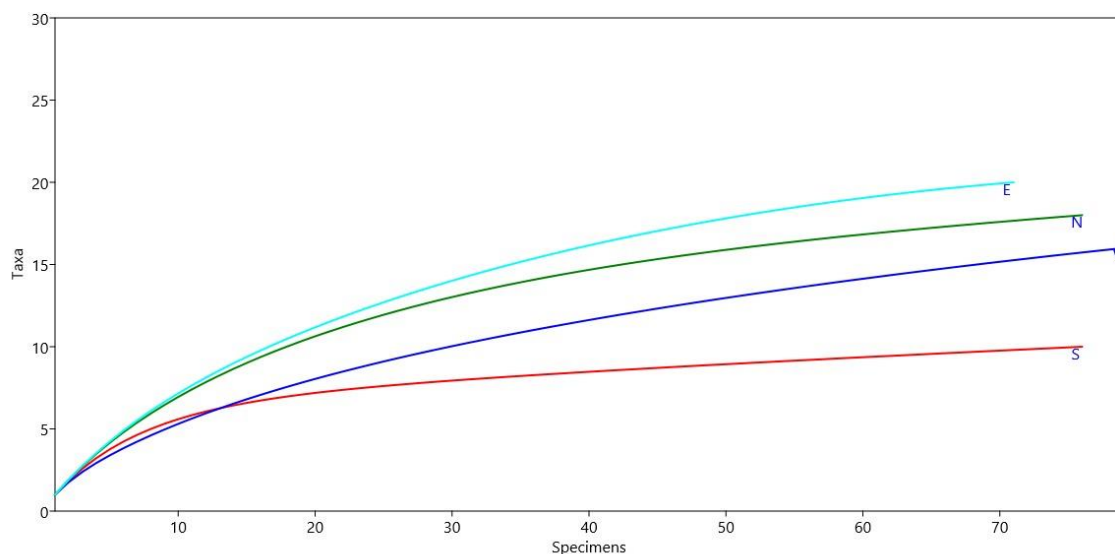

198

199 **Fig. 2:** Rarefaction curve analysis of four districts of Sikkim, East (E), West (W), South (S) and  
200 North (N).

### 201 **3.3 Microbial Diversity**

202 The phylum wise distribution revealed the dominance of *Bacteroidetes*, *Proteobacteria*,  
203 *Verrucomicrobia*, *Planctomycetes*, *Armatimonadetes* and to lesser extent *Parcubacteria*,  
204 *Actinobacteria* with other minor groups like *Aquificae*, *Firmicutes*, *Hydrogenedentes*,  
205 *Acidobacteria*, *Nitrospirae*, *Deinoococcus-Thermus*, and *Chloroflexi* (**Fig. 3a**). Diversity ratio  
206 was significantly different within the samples of each district. Spring water from east district  
207 showed the dominance of *Proteobacteria* (41%), *Bacteroidetes* (33.21%) followed by  
208 *Verrucomicrobia* (15.12%) and *Planctomycetes* (7.54%). Major phylum from the spring water of  
209 west district was *Planctomycetes* (38.46%), *Bacteroidetes* (24.04%), *Proteobacteria* (21%) and  
210 with least abundance of *Armatimonadetes* (8.08%) and *Verrucomicrobia* (6.47%). Potable spring  
211 water of south district was predominated by *Verrucomicrobia* with 33% of relative abundance  
212 followed by *Bacteroidetes* (25.46%), *Proteobacteria* (23.25%) and *Planctomycetes* (13.05%).  
213 Sample from north district showed the dominance of *Proteobacteria* (35.80%) followed by  
214 *Bacteroidetes* (34.90%) and *Planctomycetes* (22.16%). Distant from the validated phyla few  
215 *Candidatus* phyla were also recorded though at lower abundance throughout the samples viz.  
216 *TM6*, *WWE3*, *SRI*, *SBR1093*, *FBP*, *CPR2*.

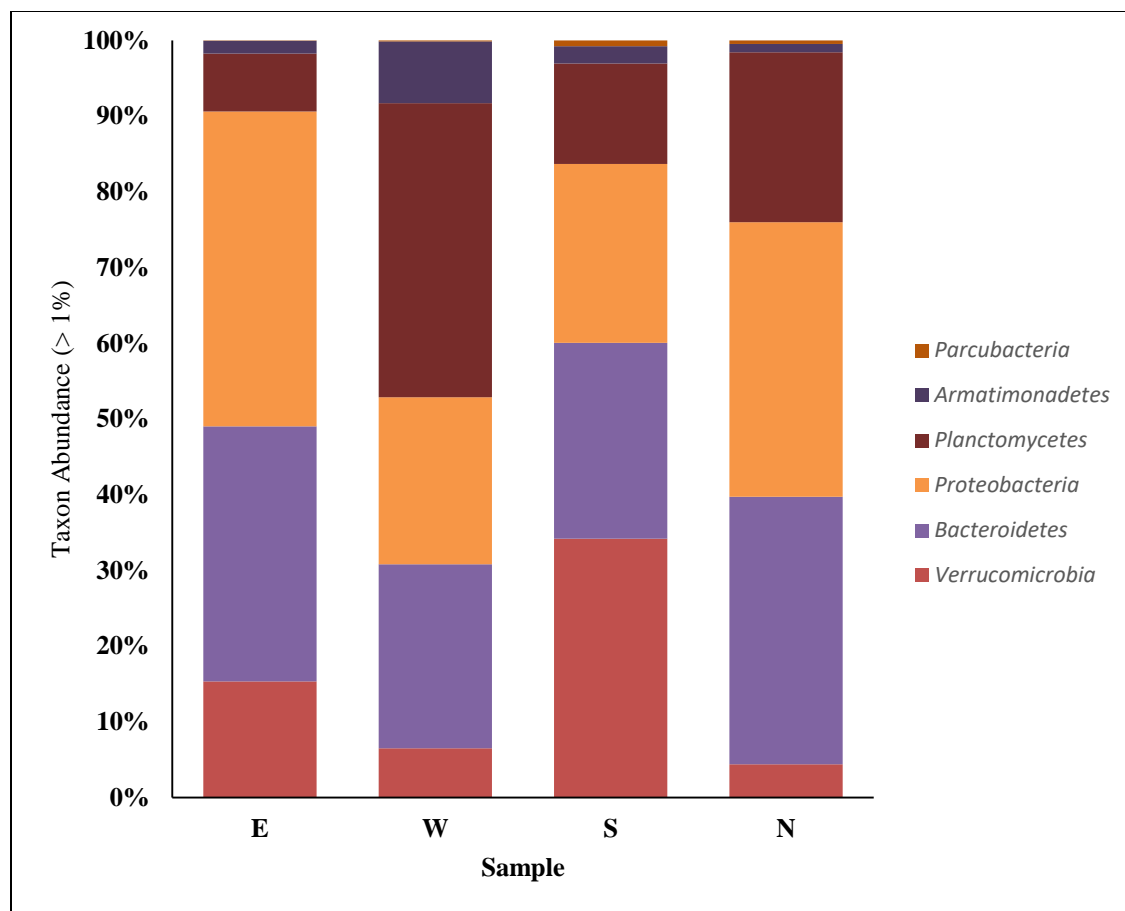

217

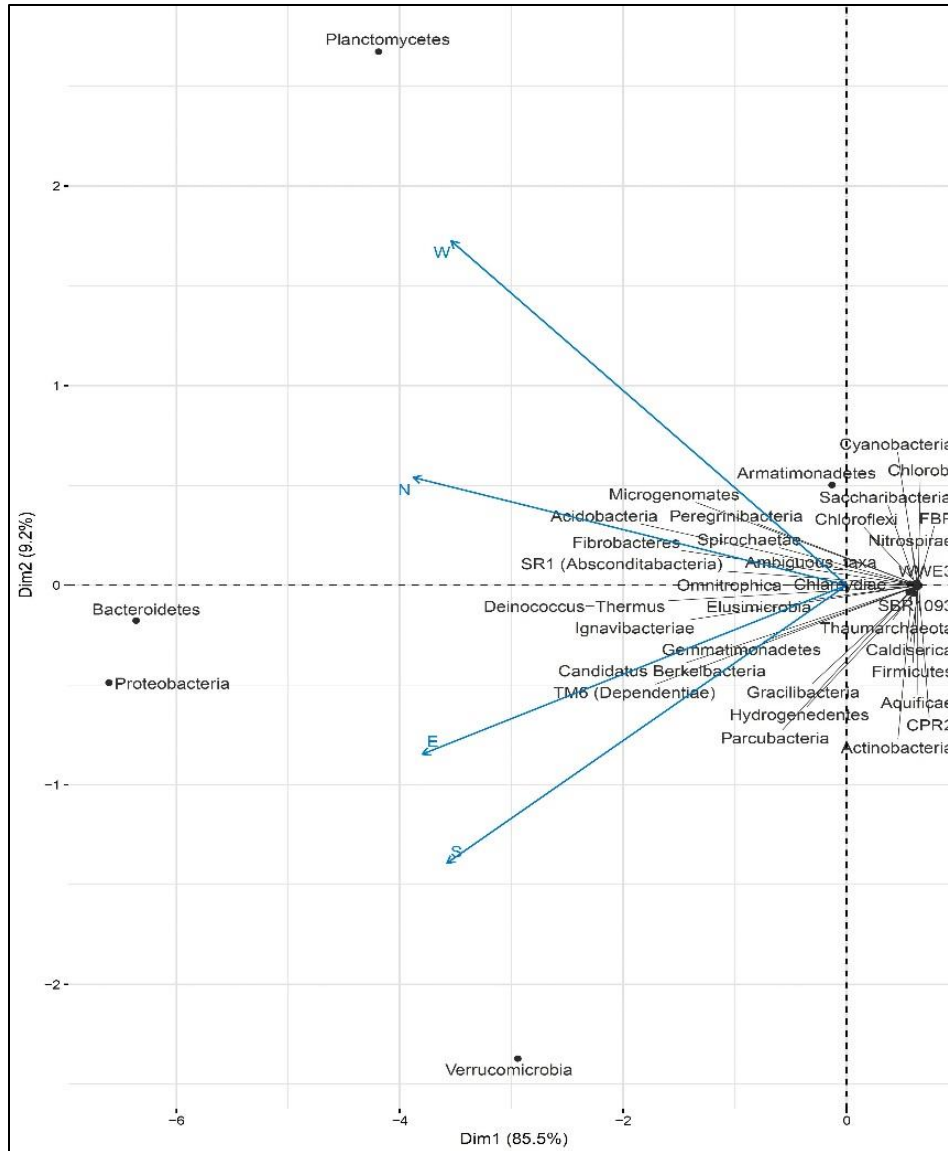

218  
219 **Fig. 3:** Relative abundance of phylum as identified from the spring water samples of East (E),  
220 West (W), South (S) and North (N) districts. Major phylum as found were *Bacteroidetes*,  
221 *Proteobacteria*, *Verrucomicrobia*, and *Planctomycetes* and as represented in Bar-plot (a) and  
222 PCA-Biplot: The principal component analysis using unweighted unifrac distance method  
223 showed the microbial distribution in the sample of west and north, east and south are correlated  
224 (b).

225 Family wise distribution (**Fig. 4**) showed the major dominance of *Verrucomicrobiaceae*,  
226 *Verrucomicrobia subdivision3*, *Planctomycetaceae*, *Comamonadaceae*, *Cytophagaceae*,  
227 *Rhodospirillaceae*, *Sphingomonadaceae*, *Chitinophagaceae*, *Glycomycetaceae*, and  
228 *Flavobacteriaceae*. Springs from the east district were mainly dominated by *Cytophagaceae*  
229 (15.22%) while the west district was dominated by *Planctomycetaceae* (38.34%). South district  
230 showed the dominance of family *Verrucomicrobiaceae* (19.84%) and the north district was  
231 dominated by *Planctomycetaceae* (22.12%). Some of the major genus found in the spring water  
232 was *Brevifolis*, *Flavobacterium*, *Verrucomicrobia subdivision3*, *Emticicia*, *Cytophaga*,  
233 *Prostheco bacter*, *Planctomycetes*, *Varivorax*, *Arcicella* *Isosphaera*, *Sediminibacterium*,  
234 *Acinetobacter*, *Chitinophaga*, *Rhodopirellula*, *Tenacibaculum*, *Flexibacter*, *Ustilago*,  
235 *Lactobactria*, *Flectobacillus*, *Pandora* and *Geobacillus*. East district was dominated by genus  
236 *Emticicia* (14.83%), west district by *Planctomyces* (36.89%), south district by *Brevifollis*  
237 (19.02%) and north district by *Arcicella* (18.29%) (**Fig. 5**).

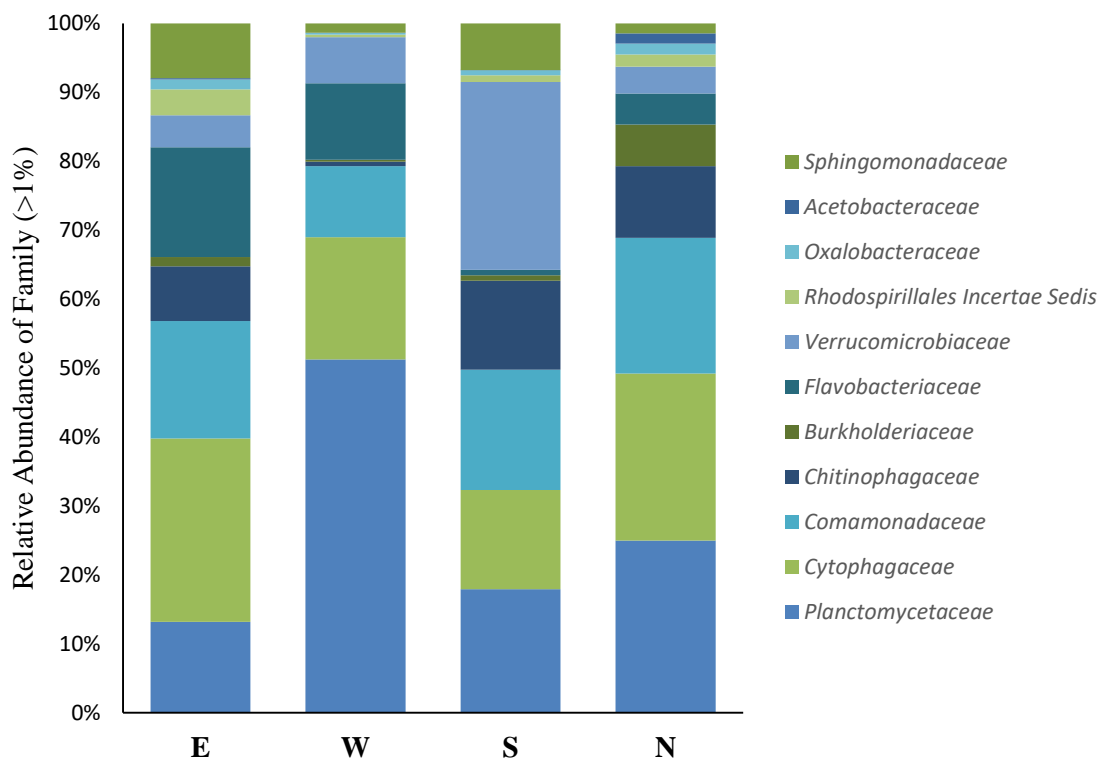

238

239 **Fig. 4:** Family wise distribution of microbial flora across four districts, East (E), West (W),

240 South(S) and North (N).

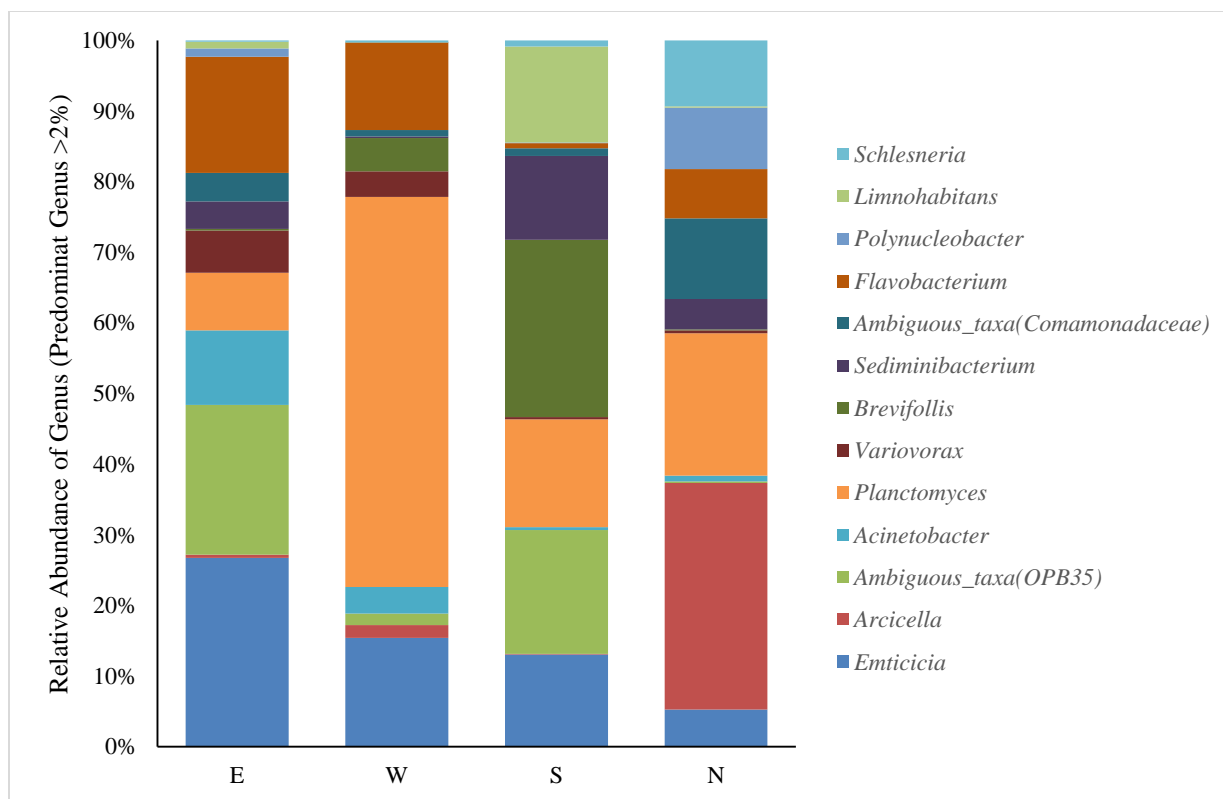

241  
242 **Fig. 5:** Relative Abundance of Genus in the spring water of four districts of Sikkim. The chart  
243 was prepared excluding the genus with less than 50 reads correspondingly in all the samples.

### 244 3.4 Comparative Community Analysis

245 Comparative community analysis of the Microbiome of spring water from the four districts  
246 showed a significant correlation pattern. Genus *Arcicella*, *Planctomyces*, *Polynucleobacter*,  
247 *Schlesneria* were mainly found in the spring water of north district with comparably higher  
248 relative abundance than the other districts. Genus *Brevifollis*, *Limnohabitans*, *Sediminibacterium*  
249 were abundant in the waters of south district. Except in south district, genus *Flavobacterium* was  
250 found to be predominant in the spring water of north, east and west districts. Although genus  
251 *Planctomyces* were found in all the districts, its dominance in the West district was found to be  
252 high. *Emticicia* was a dominant genus of the East district with relatively low abundance in west  
253 and south district and in North district presence of genus *Emticicia* was not recorded. Heatmap



254 produced with the Bray Curtis distance method produced three clusters showing the close  
255 relationship between the Microbiome of west district and east district which is again related to  
256 the South district. North produces the out-group showing the different community structure from  
257 the rest of three districts (**Fig. 6a**). This can also be observed from the principal component  
258 analysis where the Microbiome of east and south are showing close correlation and which is  
259 again distantly related to the Microbiome of the west but north have totally different microbial  
260 community structure (**Fig. 6b**).

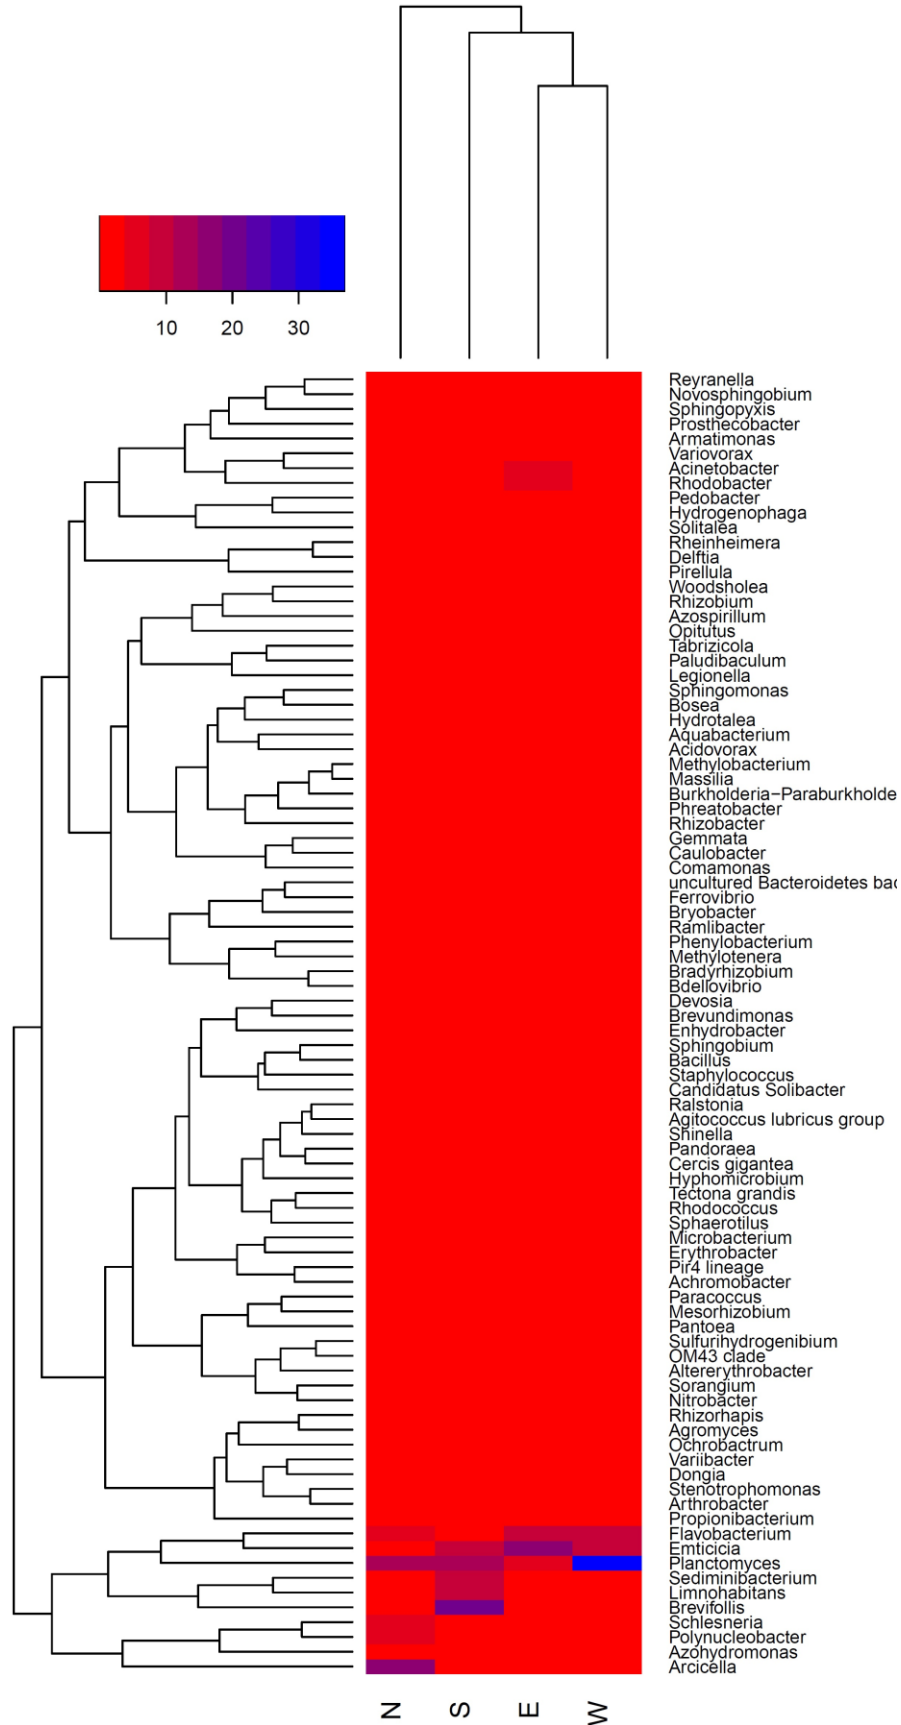

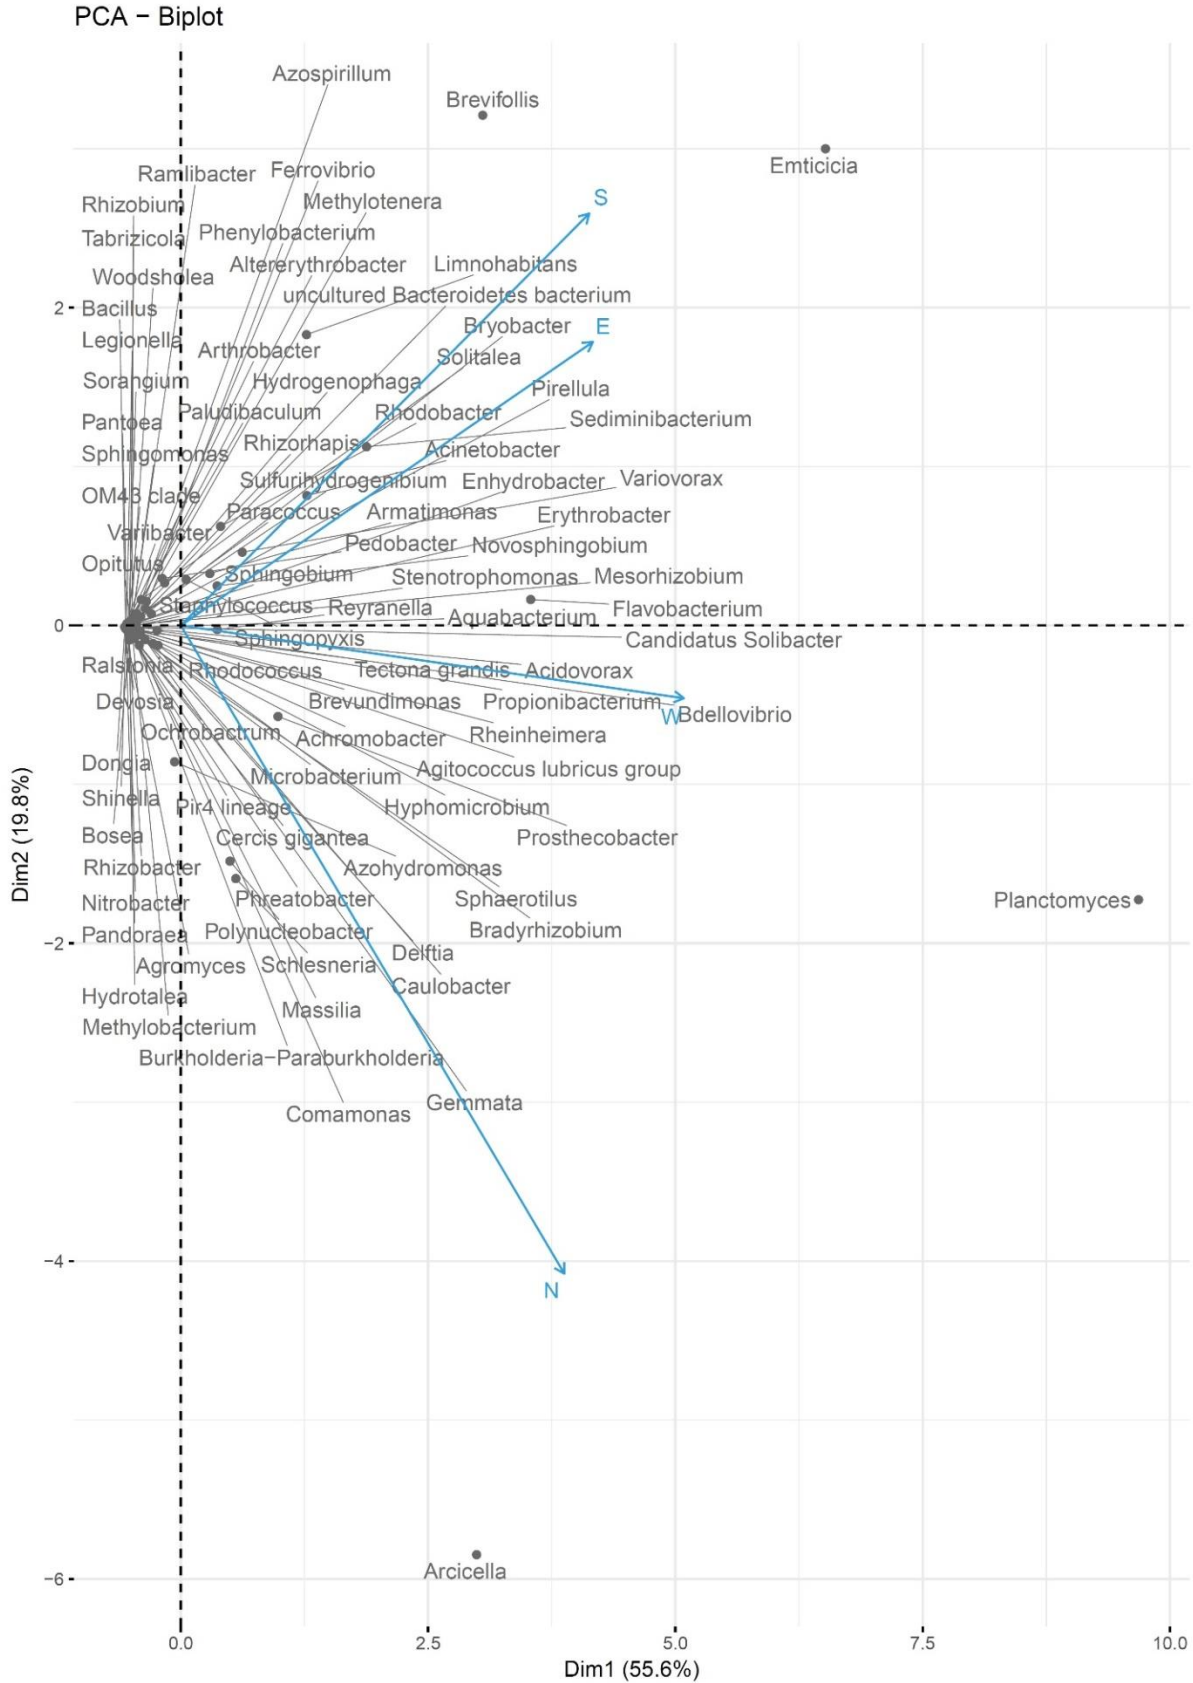

263 **Fig. 6:** Heatmap drew with Bray Curtis distance method to analyze the comparative difference in  
264 microbial diversity among the metagenomic library of spring waters from east, west, south and  
265 north district (color key: red = lowest, blue = highest. **(b)** Principale component analysis of the  
266 microbial community of four districts (at genus level), the analysis showed a close relationship  
267 between the microbial community of east and south, while they are distantly related to the west,  
268 but north has totally different community structure forming an outgroup in the plot.

### 269 **3.5 The relationship between physicochemical characteristics and microbial diversity**

270 Multivariate canonical correspondence analysis of seven physicochemical parameter and seven  
271 dominant microorganisms of four districts showed a significant relationship. The distribution of  
272 dominant genus i.e. *Emticicia* and *Flavobacterium* in the east district was found to be closely  
273 dependent on the concentration of sodium (41.5ng/l) and calcium (35.2ng/l). Correspondingly,  
274 the relative abundance of the dominant genus of west district i.e. *Planctomyces* was found to be  
275 dependent on the concentration of Barium (9.761), Iron (10.823) and it was also influenced by  
276 the temperature. The dominance of *Arcicella* and *Schlesneria* in the North district was correlated  
277 with electroconductivity of water. Genus *Brevifolis* and *Sediminibacterium* in South district were  
278 correlated with the total dissolved solids present in the springs of South district (**Fig. 7**).

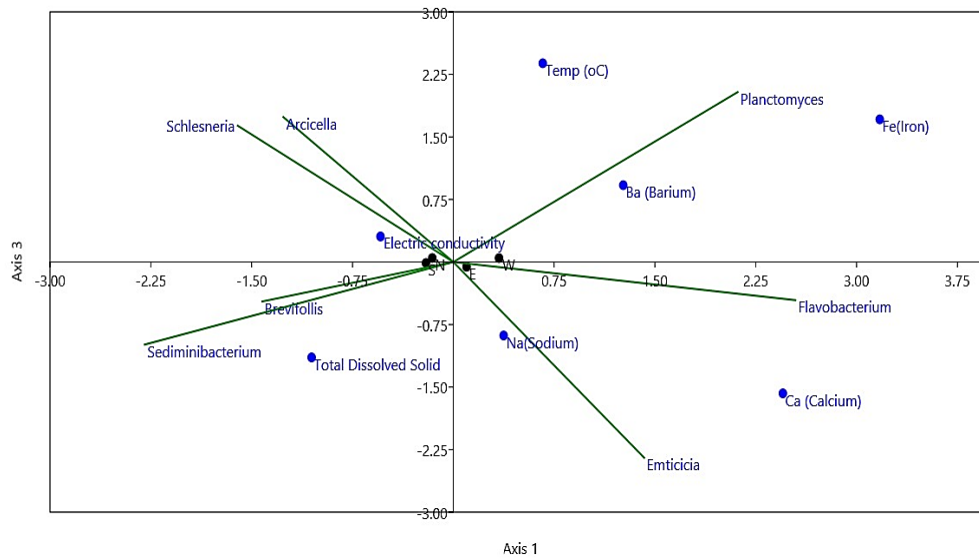

279

280 **Fig. 7:** CCA plot showing the relationship between physicochemical parameters and microbial  
281 diversity (genus).

#### 282 **4 Discussion**

283 Sikkim is a northeastern state lying in the lower region of Eastern Himalaya and neighbors to the  
284 countries China, Bhutan and Nepal. It is among the three hot spot ecoregions of India (The  
285 Western Ghat, Eastern Himalaya and Indo-Burma) with diverse fauna and flora. In topology, it  
286 has mountain terrain with wide altitude variation from 800 -8000 meters. With a population of 6,  
287 10, 577 it is the second smallest state of India. Majority of the population living in different  
288 altitudes are dependent on the natural spring waters for drinking and household purposes. Quality  
289 of life increases when people have access to safe drinking water with adequate sanitation. Better  
290 management of water resources to reduce different water-borne diseases and to make water safe  
291 for both potable and recreational purpose can save many lives. Water safety and quality are  
292 fundamental to human development and well-being (WHO, 2018). However, till date, no such

293 studies have been conducted in Sikkim to determine the water structure of natural springs from  
294 microbiological or chemical aspects. Microbiological analysis is one the main facet of water  
295 quality measurement. Taxonomic profiling of dominant microflora can be an environmental  
296 indicator of water quality and can forecast future health threats in the surroundings. Knowing the  
297 ecology could be helpful in determining future water treatment protocols. But, limitation of  
298 culture-dependent methods has always been a barrier for comprehensive microbial ecology  
299 analysis. Development of metagenomics approaches and next-generation sequencing has allowed  
300 the scientist to overcome the barrier to determine the total microbial biodiversity of an  
301 environment. In this study, microbial ecology of the spring waters of Sikkim was determined by  
302 next-generation sequencing using variable regions of 16S rRNA gene (V3 -V4). To our  
303 knowledge, this is the first report on the microbial ecology of spring waters of Eastern and  
304 Western Himalayan Region of India.

305         The study showed a major dominance of *Bacteroidetes*, *Proteobacteria*, *Verrucomicrobia*  
306 and *Planctomycetes* in all the springs of East (E), West (W), South (S) and North (N) districts  
307 (**Fig. 3a**). Springs of East district was dominated by *Proteobacteria* (41%) while springs of West  
308 district was dominated by *Planctomycetes* (38.46%). *Planctomycetes* (7.54%) was least  
309 dominated in the East as compared to the West district (38.46%). *Planctomycetes* are a phylum  
310 of aquatic bacteria, with its habitat in fresh, marine and brackish water (Fieseler *et al.*, 2004).  
311 They possess unusual characteristics such as intracellular compartmentalization and they lack  
312 peptidoglycan in their cell walls. Remarkably, few genera of this group like *Gemmata* even  
313 contain membrane-bound nucleoid similar to the eukaryotic nucleus (Boedeker *et al.*, 2017).  
314 Although a recent study reported its close similarity to Gram-negative bacteria however in-depth  
315 genetic studies is still lacking (Boedeker *et al.*, 2017). A unique bacterial phylum

316 *Armatimonadetes* (8.08%) was recorded from the samples of the west districts which are not  
317 found in springs of other districts. Prior to official classification of *Armatimonadetes* by Tamaki  
318 *et al.*, (2011), it was classified as candidate division of OP10, first identified by Hugenholtz *et*  
319 *al.*, (1998) from Obsidian Pool, Yellowstone National Park (Hugenholtz *et al.*, 1998; Tamaki *et*  
320 *al.*, 2011; Lee *et al.*, 2014). *Armatimonadetes* as a gram-negative oligotrophic aerobic bacterium  
321 was described by Lee *et al.*, 2014. Spring water from South district was dominated by  
322 *Verrucomicrobia* (25.46%). *Verrucomicrobia* have only a few described species so far, most of  
323 the genus of the phylum is non-culturable and they are ubiquitous in freshwater and soil (Gupta,  
324 2016; Griffiths and Gupta, 2007). The spring water of both North and East district was  
325 dominated by *Proteobacteria* (35.80 %) and *Bacteroidetes* (34.90%). The principal component  
326 analysis of relative phyla diversity also showed a close correlation between samples of the East  
327 and North districts while samples of South and West districts were distantly related (**Fig. 3b**).

328         The spring waters from four districts of Sikkim showed considerable differences among  
329 their dominant genus (**Fig. 5**). The spring water of North was most diverse out of the three  
330 districts having major dominance of *Arcicella*, *Planctomycetes*, *Polynucleobacter*, *Schlesneria*  
331 and *Azohydromonas*. This difference in diversity can be due to the variance in the  
332 physicochemical parameter. North district has a comparatively lower temperature (17 -22 °C) in  
333 comparison to other districts. *Arcicella* is aerobic gram-negative bacteria was first proposed by  
334 Nikitin *et al.*, (2004) (Nikitin *et al.*, 2004). Some of the novel species of *Arcicella* are isolated  
335 and identified from aquatic environment like *Arcicella aurantica* from stream water in Southern  
336 Taiwan (Sheu *et al.*, 2018), *Arcicella rosea* from tap water (Kampfer *et al.*, 2009) and *Arcicella*  
337 *rigui* from Niao-Song Wetland Park in Taiwan (Chen *et al.*, 2013). Though the presence of  
338 *Planctomycetes* was found in all the four districts with lower relative abundance, its dominance

339 was maximum at West (38.46%) and least at East district. The springs of East district was mainly  
340 dominated by the bacteria *Emticicia* (14.83%). *Emticicia* is a gram-negative bacterial genus  
341 belongs to family *Cytophagaceae* and they are ubiquitous in the aquatic environment (Schultz *et*  
342 *al.*, 2013; Seo *et al.*, 2015; Nam *et al.*, 2016). A number of significant members from the genera  
343 were identified in aquatic systems *viz.* *Emticicia aquatica* (Seo *et al.*, 2015), *Emticicia aquatilis*  
344 (Ngo *et al.*, 2017), and *Emticicia fontis* (Nam *et al.*, 2016). The bacterial genera *Flavobacterium*  
345 was found in all the other three districts except in the south. *Flavobacterium* a gram-negative  
346 bacterium belongs to phylum *Bacteroidetes* and are widely distributed in a freshwater ecosystem  
347 (Fernández-Gómez *et al.*, 2013). *Flavobacterium* is responsible for bacterial cold water and  
348 bacterial gill diseases in different fish species (Strepparava *et al.*, 2014). They are also  
349 opportunistic human pathogens, there are several reports on their association with pneumonia  
350 and bloodstream infection (Manfredi *et al.*, 1999; Holmes *et al.*, 1984). *Rhodobacter* and  
351 *Acinetobacter* were found in the south district which was absent in spring waters of other  
352 districts. The diversity of *Rhodobacter* in an aquatic system is ubiquitous; they are  
353 photosynthetic bacteria belonging to phylum *Proteobacteria* (IMHOFF *et al.*, 1984). Some of the  
354 important *Rhodobacter sp.* identified from aquatic environment are *Rhodobacter adriaticus*  
355 isolated from Adriatic Sea (IMHOFF *et al.*, 1984); *Rhodovulum aestuarii* isolated from brackish  
356 water collected from an estuary (Ramana *et al.*, 2016); *Rhodobacter azollae* and *Rhodobacter*  
357 *lacus* isolated from different pond samples of Kukatpally, India (Suresh *et al.*, 2017);  
358 *Rhodobacter vinaykumarii* a marine phototrophic *alpha-proteobacterium* from tidal waters in  
359 Visakhapatnam, on the east coast of India (Srinivas *et al.*, 2007). There are also reports from  
360 Himalayan regions *viz.* *Rhodobacter changlensis* which was isolated from snow sample of  
361 Changlapass in the Indian Himalaya (Anil Kumar *et al.*, 2007). Presence of *Acinetobacter* in



362 rural drinking water systems dates back to 1989 (Bifulco *et al.*, 1989). Since then, there are  
363 several reports of its presence in drinking water sources (Towner, 2006; Krizova *et al.*, 2015;  
364 Radolfova-Krizova *et al.*, 2016) and transmission of drug-resistant *Acientobacter* through oral  
365 route (Umezawa *et al.*, 2015). Principle component analysis (**Fig. 6b**) of the microbial diversity  
366 of four districts showed East and South is correlated in genus wise distribution and they are  
367 distantly related with the West district but North district produced an out-grouped showing the  
368 divergence in diversity.

369 Canonical Correspondence Analysis (**Fig. 7**) confirmed the correlation between hydrochemistry  
370 and diversity. The diversity in the springs of the four districts is influenced by the concentration  
371 of different metallic compounds like sodium, calcium, barium, and iron. The diversity of  
372 *Emticicia* and *Flavobacterium* are influenced by the concentration of sodium and calcium while  
373 the diversity of *Planctomyces* was found to be dependent on the concentration of Barium and  
374 Iron. Along with the different chemical parameters, physical parameters like temperature, pH  
375 and electro-conductivity also had an influence on the diversity of microorganisms. The  
376 dominance of *Arcicella*, *Schlesneria*, *Brevifolis* and *Sediminibactrium* are influenced by the  
377 electroconductivity and total dissolved solids respectively. The results of this study significantly  
378 expand the current understanding of microbiology of the spring water of Sikkim and it also  
379 reports the comprehensive knowledge on microbial community structure which will help in near  
380 future to determine or to design any water treatment protocols or policies. This study also  
381 provides a brief insight of the physicochemical parameters of the spring water of Sikkim and  
382 their cross association with the indigenous microbial diversity.

383

## 384 **Acknowledgement**

385 The authors wish to thank the State Institute of Rural Development Department, Government of  
386 Sikkim for their helping hand in providing information about springs locations and water sample  
387 collection. The authors also like to thank all the faculty member, non-teaching staff of the  
388 Department of Microbiology, Sikkim University for their continuous support and help  
389 throughout the study.

## 390 **Reference**

- 391 Anil Kumar P, Srinivas TNR, Sasikala C, Ramana C V. (2007). *Rhodobacter chaglensis* sp.  
392 nov., a psychrotolerant, phototrophic alphaproteobacterium from the Himalayas of India. *Int J*  
393 *Syst Evol Microbiol* **57**: 2568–2571.
- 394 Bifulco JM, Shirey JJ, Bissonnette GK. (1989). Detection of *Acinetobacter* spp. in rural drinking  
395 water supplies. *Appl Environ Microbiol* **55**: 2214–9.
- 396 Boedeker C, Schüler M, Reintjes G, Jeske O, van Teeseling MCF, Jogler M, *et al.* (2017).  
397 Determining the bacterial cell biology of Planctomycetes. *Nat Commun* **8**: 14853.
- 398 Brown M V., Philip GK, Bunge JA, Smith MC, Bissett A, Lauro FM, *et al.* (2009). Microbial  
399 community structure in the North Pacific ocean. *ISME J* **3**: 1374–1386.
- 400 Chen W-M, Yang S-H, Young C-C, Sheu S-Y. (2013). *Arcicella rigui* sp. nov., isolated from  
401 water of a wetland, and emended descriptions of the genus *Arcicella*, *Arcicella aquatica*,  
402 *Arcicella rosea* and *Arcicella aurantiaca*. *Int J Syst Evol Microbiol* **63**: 134–140.
- 403 Das S, Bora SS, Yadav RNS, Barooah M. (2017). A metagenomic approach to decipher the  
404 indigenous microbial communities of arsenic contaminated groundwater of Assam. *Genomics*

- 405 *Data* **12**. e-pub ahead of print, doi: 10.1016/j.gdata.2017.03.013.
- 406 Dinsdale EA, Edwards RA, Hall D, Angly F, Breitbart M, Brulc JM, *et al.* (2008). Functional  
407 metagenomic profiling of nine biomes. *Nature* **452**: 629–632.
- 408 Fernández-Gómez B, Richter M, Schüler M, Pinhassi J, Acinas SG, González JM, *et al.* (2013).  
409 Ecology of marine Bacteroidetes: a comparative genomics approach. *ISME J* **7**: 1026–37.
- 410 Fieseler L, Horn M, Wagner M, Hentschel U. (2004). Discovery of the novel candidate phylum  
411 “Poribacteria” in marine sponges. *Appl Environ Microbiol* **70**: 3724–32.
- 412 Griffiths E, Gupta RS. (2007). Phylogeny and shared conserved inserts in proteins provide  
413 evidence that Verrucomicrobia are the closest known free-living relatives of chlamydiae.  
414 *Microbiology* **153**: 2648–2654.
- 415 Gupta RS. (2016). Impact of genomics on the understanding of microbial evolution and  
416 classification: the importance of Darwin’s views on classification Danchin A (ed). *FEMS*  
417 *Microbiol Rev* **40**: 520–553.
- 418 Hemme CL, Tu Q, Shi Z, Qin Y, Gao W, Deng Y, *et al.* (2015). Comparative metagenomics  
419 reveals impact of contaminants on groundwater microbiomes. *Front Microbiol* **6**: 1–12.
- 420 Holmes B, Owen RJ, Steigerwalt AG, Brenner ’ DJ. (1984). *Flavobacterium gleum*, a New  
421 Species Found in Human Clinical Specimens. *Int J Syst Bacteriol* **34**: 21–25.
- 422 Hörmannspenger G, Clavel T, Haller D. (2012). Gut matters: Microbe-host interactions in  
423 allergic diseases. *J Allergy Clin Immunol* **129**: 1452–1459.
- 424 Hugenholtz P, Pitulle C, Hershberger KL, Pace NR. (1998). Novel division level bacterial  
425 diversity in a Yellowstone hot spring. *J Bacteriol* **180**: 366–76.

- 426 IMHOFF JF, TRUPER HG, PFENNIG N. (1984). Rearrangement of the Species and Genera of  
427 the Phototrophic &quot;Purple Nonsulfur Bacteria&quot; *Int J Syst Bacteriol* **34**: 340–343.
- 428 Jones RT, Robeson MS, Lauber CL, Hamady M, Knight R, Fierer N. (2009). A comprehensive  
429 survey of soil acidobacterial diversity using pyrosequencing and clone library analyses. *ISME J*  
430 **3**: 442–453.
- 431 Kampfer P, Lodders N, Busse H-J. (2009). *Arcicella rosea* sp. nov., isolated from tap water. *Int J*  
432 *Syst Evol Microbiol* **59**: 341–344.
- 433 Krizova L, Maixnerova M, Sedo O, Nemecek A. (2015). *Acinetobacter albensis* sp. nov., isolated  
434 from natural soil and water ecosystems. *Int J Syst Evol Microbiol* **65**: 3905–3912.
- 435 Lagkouvardos I, Joseph D, Kapfhammer M, Giritli S, Horn M, Haller D, *et al.* (2016). IMNGS:  
436 A comprehensive open resource of processed 16S rRNA microbial profiles for ecology and  
437 diversity studies. *Sci Rep* **6**: 1–9.
- 438 Lee E, Khurana MS, Whiteley AS, Monis PT, Bath A, Gordon C, *et al.* (2017). Novel primer  
439 sets for next generation sequencing-based analyses of water quality. *PLoS One* **12**: 1–17.
- 440 Lee KCY, Dunfield PF, Stott MB. (2014). The Phylum Armatimonadetes. In: *The Prokaryotes*.  
441 Springer Berlin Heidelberg: Berlin, Heidelberg, pp 447–458.
- 442 Manfredi R, Nanetti A, Ferri M, Mastroianni A, Coronado O V, Chiodo F. (1999).  
443 *Flavobacterium* spp. organisms as opportunistic bacterial pathogens during advanced HIV  
444 disease. *J Infect* **39**: 146–52.
- 445 McLain JET, Rock CM, Lohse K, Walworth J. (2011). False-positive identification of  
446 *Escherichia coli* in treated municipal wastewater and wastewater-irrigated soils. *Can J Microbiol*

447 **57**: 775–784.

448 Nam GG, Joung Y, Song J, Lim Y, Cho J-C. (2016). *Emticicia fontis* sp. nov., isolated from a  
449 freshwater pond. *Int J Syst Evol Microbiol* **66**: 5161–5166.

450 Ngo HTT, Trinh H, Yang J-E, Won K-H, Chu D-H, Kook M, *et al.* (2017). *Emticicia aquatilis*  
451 sp. nov., isolated from a freshwater sample. *Int J Syst Evol Microbiol* **67**: 1703–1708.

452 Nikitin DI, Strömpl C, Oranskaya MS, Abraham W-R. (2004). Phylogeny of the ring-forming  
453 bacterium *Arcicella aquatica* gen. nov., sp. nov. (ex Nikitin et al. 1994), from a freshwater  
454 neuston biofilm. *Int J Syst Evol Microbiol* **54**: 681–684.

455 Pandey PK, Kass PH, Soupir ML, Biswas S, Singh VP. (2014). Contamination of water  
456 resources by pathogenic bacteria. *AMB Express* **4**: 51.

457 Port JA, Wallace JC, Griffith WC, Faustman EM. (2012). Metagenomic Profiling of Microbial  
458 Composition and Antibiotic Resistance Determinants in Puget Sound. *PLoS One* **7**: e48000.

459 Radolfova-Krizova L, Maixnerova M, Nemecek A. (2016). *Acinetobacter pragensis* sp. nov., found  
460 in soil and water ecosystems. *Int J Syst Evol Microbiol* **66**: 3897–3903.

461 Ramana C V., Sasikala C, Lakshmi KVNS, Bharti D, Divyasree B. (2016). *Rhodovulum*  
462 *aestuarii* sp. nov., isolated from a brackish water body. *Int J Syst Evol Microbiol* **66**: 165–171.

463 Van Rossum T V., Peabody MA, Uyaguari-Diaz MI, Cronin KI, Chan M, Slobodan JR, *et al.*  
464 (2015). Year-long metagenomic study of river microbiomes across land use and water quality.  
465 *Front Microbiol* **6**: 1–15.

466 Rothschild LJ. (1991). A model for diurnal patterns of carbon fixation in a Precambrian  
467 microbial mat based on a modern analog. *BioSystems* **25**: 13–23.

- 468 Sanapareddy N, Hamp TJ, Gonzalez LC, Hilger HA, Fodor AA, Clinton SM. (2009). Molecular  
469 diversity of a north carolina wastewater treatment plant as revealed by pyrosequencing. *Appl*  
470 *Environ Microbiol* **75**: 1688–1696.
- 471 Schultz GE, Kovatch JJ, Anneken EM. (2013). Bacterial diversity in a large, temperate, heavily  
472 modified river, as determined by pyrosequencing. *Aquat Microb Ecol* **70**: 169–179.
- 473 Seo M, Joung Y, Kang H, Kim H, Cho J-C, Ahn T, *et al.* (2015). *Emticicia aquatica* sp. nov., a  
474 species of the family Cytophagaceae isolated from fresh water. *Int J Syst Evol Microbiol* **65**:  
475 4358–4362.
- 476 Sheu S-Y, Yang C-S, Chen M-H, Arun AB, Young C-C, Chen W-M, *et al.* (2018). *Arcicella*  
477 *aurantiaca* sp. nov., isolated from stream water. e-pub ahead of print, doi: 10.1099/ijcs.0.021527-  
478 0.
- 479 Sogin ML, Morrison HG, Huber HA, Welch DM, Huse SM, Neal PR, *et al.* (2006). Microbial  
480 Diversity in the Deep Sea and the Underexplored ‘Rare Biosphere’. *PNAS* **103**: 12115–12120.
- 481 | Srinivas TNR, Anil Kumar P, Sasikala C, Ramana C V., Imhoff JF. (2007). *Rhodobacter vinay*  
482 *kumarii* sp. nov., a marine phototrophic alphaproteobacterium from tidal waters, and emended  
483 description of the genus *Rhodobacter*. *Int J Syst Evol Microbiol* **57**: 1984–1987.
- 484 Staley C, Sadowsky MJ. (2016). Application of metagenomics to assess microbial communities  
485 in water and other environmental matrices. *J Mar Biol Assoc United Kingdom* **96**: 121–129.
- 486 Staley C, Unno T, Gould TJ, Jarvis B, Phillips J, Cotner JB, *et al.* (2013). Application of  
487 Illumina next-generation sequencing to characterize the bacterial community of the Upper  
488 Mississippi River. *J Appl Microbiol* **115**: 1147–1158.

- 489 Strepparava N, Wahli T, Segner H, Petrini O. (2014). Detection and quantification of  
490 *Flavobacterium psychrophilum* in water and fish tissue samples by quantitative real time PCR.  
491 *BMC Microbiol* **14**: 105.
- 492 Suresh G, Sailaja B, Ashif A, Dave BP, Sasikala C, Ramana CV. (2017). Description of  
493 *Rhodobacter azollae* sp. nov. and *Rhodobacter lacus* sp. nov. *Int J Syst Evol Microbiol* **67**: 3289–  
494 3295.
- 495 Tamaki H, Tanaka Y, Matsuzawa H, Muramatsu M, Meng X-Y, Hanada S, *et al.* (2011).  
496 *Armatimonas rosea* gen. nov., sp. nov., of a novel bacterial phylum, Armatimonadetes phyl.  
497 nov., formally called the candidate phylum OP10. *Int J Syst Evol Microbiol* **61**: 1442–1447.
- 498 Tambe S, Kharel G, Subba S, Arrawatia ML. (2012). Rural Water Security in the Sikkim  
499 Himalaya : Status , Initiatives and Future Strategy.
- 500 Towner K. (2006). The Genus *Acinetobacter*. In: *prokaryotes*. pp 746–758.
- 501 Umezawa K, Asai S, Ohshima T, Iwashita H, Ohashi M, Sasaki M, *et al.* (2015). Outbreak of  
502 drug-resistant *Acinetobacter baumannii* ST219 caused by oral care using tap water from  
503 contaminated hand hygiene sinks as a reservoir. *Am J Infect Control* **43**: 1249–1251.
- 504 Vörösmarty CJ, McIntyre PB, Gessner MO, Dudgeon D, Prusevich A, Green P, *et al.* (2010).  
505 Global threats to human water security and river biodiversity. *Nature* **467**: 555–561.
- 506 Wang X, Wang Z, Jiang P, He Y, Mu Y, Lv X, *et al.* (2018). Bacterial diversity and community  
507 structure in the rhizosphere of four *Ferula* species. *Sci Rep* **8**: 5345.
- 508 WHO. (2018). WHO | Water safety and quality. *WHO*.  
509 [http://www.who.int/water\\_sanitation\\_health/water-quality/en/](http://www.who.int/water_sanitation_health/water-quality/en/) (Accessed February 5, 2018).

510

511 **Supplementary Files**

512 **Table S1.** The quantity of gDNA as determined by Qubit Fluorometer and mean library  
513 fragment size.

514

| <b>Sl. No.</b> | <b>Sample ID</b> | <b>The quantity of gDNA ng/<br/>μl</b> | <b>Mean Library Fragment Size<br/>(bp)</b> |
|----------------|------------------|----------------------------------------|--------------------------------------------|
| 1.             | E                | 31.7                                   | 605                                        |
| 2.             | W                | 15.0                                   | 539                                        |
| 3.             | S                | 19.8                                   | 598                                        |
| 4.             | N                | 18.5                                   | 605                                        |

515

516 **Table S2:** FastQ read statistics.

| <b>Sample</b> | <b>Number of Reads</b> | <b>Total Bases</b> | <b>Observed OTUs</b> |
|---------------|------------------------|--------------------|----------------------|
| E             | 248,903                | 116,834,615        | 687                  |
| W             | 316,594                | 151,955,051        | 747                  |
| S             | 198,909                | 94,297,897         | 534                  |
| N             | 287,074                | 198,132,358        | 729                  |

517

518 **Table S3: Diversity Index**

|                    | <b>S</b> | <b>W</b> | <b>N</b> | <b>E</b> |
|--------------------|----------|----------|----------|----------|
| <b>Simpson_1-D</b> | 0.7499   | 0.7356   | 0.6988   | 0.6928   |



|                     |       |      |       |       |
|---------------------|-------|------|-------|-------|
| <b>Shannon_H</b>    | 1.534 | 1.49 | 1.36  | 1.368 |
| <b>Fisher_alpha</b> | 8.719 | 10.7 | 13.71 | 8.107 |
| <b>Chao-1</b>       | 22    | 25   | 29    | 21    |

519
